# Supplementary material
Source: PubMed Central journal article supplement (PMC6741576)
Supplement: jin-0006-0819-s01.pdf [file jin-0006-0819-s01.pdf]

# Supplemental data

## Supplemental Materials and Methods

### ELISA

Microtiter plates were coated overnight with histones (100 nM) in coating buffer (15.9 mM Na<sub>2</sub>CO<sub>3</sub>, 30 mM NaHCO<sub>3</sub>, pH 9.6) and stored over night at 4°C. Plates were then washed three times in deionized water, blocked in phosphate buffered saline containing 0.05% Tween-20 (PBST) and 0.5% bovine serum albumin for 30 min at 37°C. After a washing step, plates were probed with MBP (8 nM) for 1 h at 37°C and binding was detected with a polyclonal antisera against MBP-p33 (1:5000) and a peroxidase-conjugated antibody against rabbit IgG (1:2500, 1 h, 37°C, Bio-Rad Laboratories). All incubations were followed by a washing step in PBST. The polyclonal antisera against MBP-p33 was tested to detect MBP and MBP-p33 equally in equimolar concentrations.

### *In vitro* hemolysis assay

Citrated blood (1 ml) was centrifuged (2000 x g, 10 min, 4°C), plasma was removed and replaced by 1 ml PBS. The washing step was repeated two times. Histone H4 were diluted in PBS to 10 µM in presence or absence of 10 µM native p33 to a final volume of 60 µl. Tox-7 lysis buffer and PBS served as positive and negative control, respectively. Three µl washed blood cells (5% v/v) were added to each sample and the samples were incubated (60 min, 37°C on rotation) in a heat block. All samples were centrifuged (2000 x g, 10 min, RT) and the supernatants were transferred to microtiter plates. Absorbance of hemoglobin was measured at 540 nm and histone-induced hemolysis was expressed as percentage of Tox-7 lysis induced hemolysis.

### ***In vivo* imaging of MBP-p33 in mice**

MBP-p33 was labeled with a fluorochrome (VivoTag 680XL) using Protein Labeling Kit (PerkinElmer) according to manufacturer's instructions. Mice, anesthetized with isoflurane, were injected i.v. with fluorescent MBP-p33 and its distribution was visualized every day for 7 days using the *In Vivo* Imaging System from PerkinElmer (IVIS Spectrum). At time points 1 h and 1 day, mice were sacrificed and MBP-p33 distribution in different organs was visualized. PBS injected mice served as control.

## Supplemental Figure legends

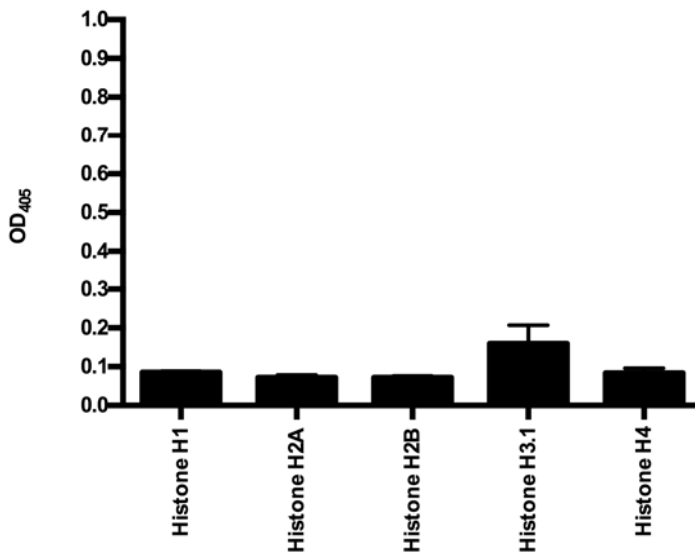

### Supplemental Figure 1. **MBP does not bind to histones**

Microtiter plates were coated with different subclasses of histones (100 nM), probed with MBP (8 nM) and detected with a polyclonal antibody against MBP-p33. Mean and SE from three individual experiments are shown.

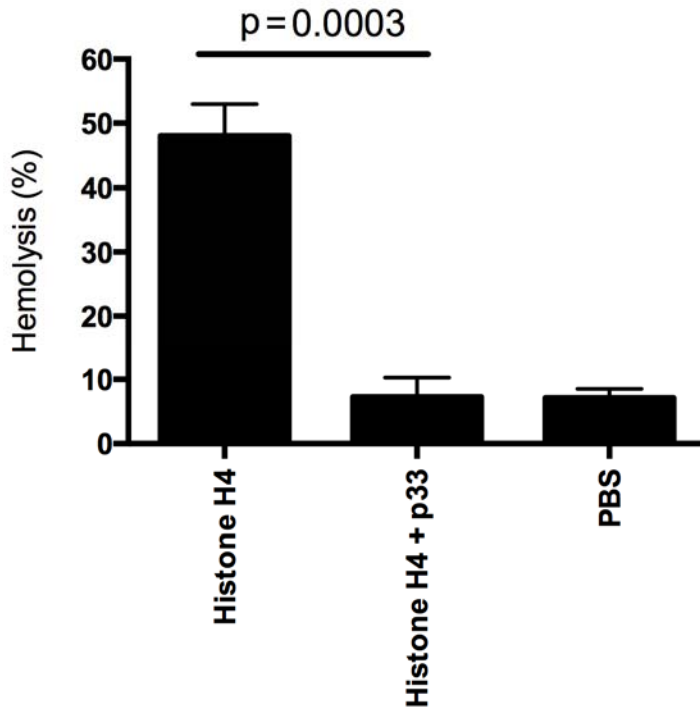

Supplemental Figure 2. **Native p33 inhibits the cytolytic activity of histone H4 against erythrocytes.** Histone H4 (10  $\mu$ M) were incubated (60 min at 37°C) with washed and diluted human erythrocytes (5% v/v) in the absence or presence of 10  $\mu$ M p33. Samples were centrifuged and the release of hemoglobin was measured in the supernatant at 540 nm. Hemolysis was calculated as percentage of cells treated with Tox-7 Lysis buffer. Data are mean and SE values from three separate experiments.

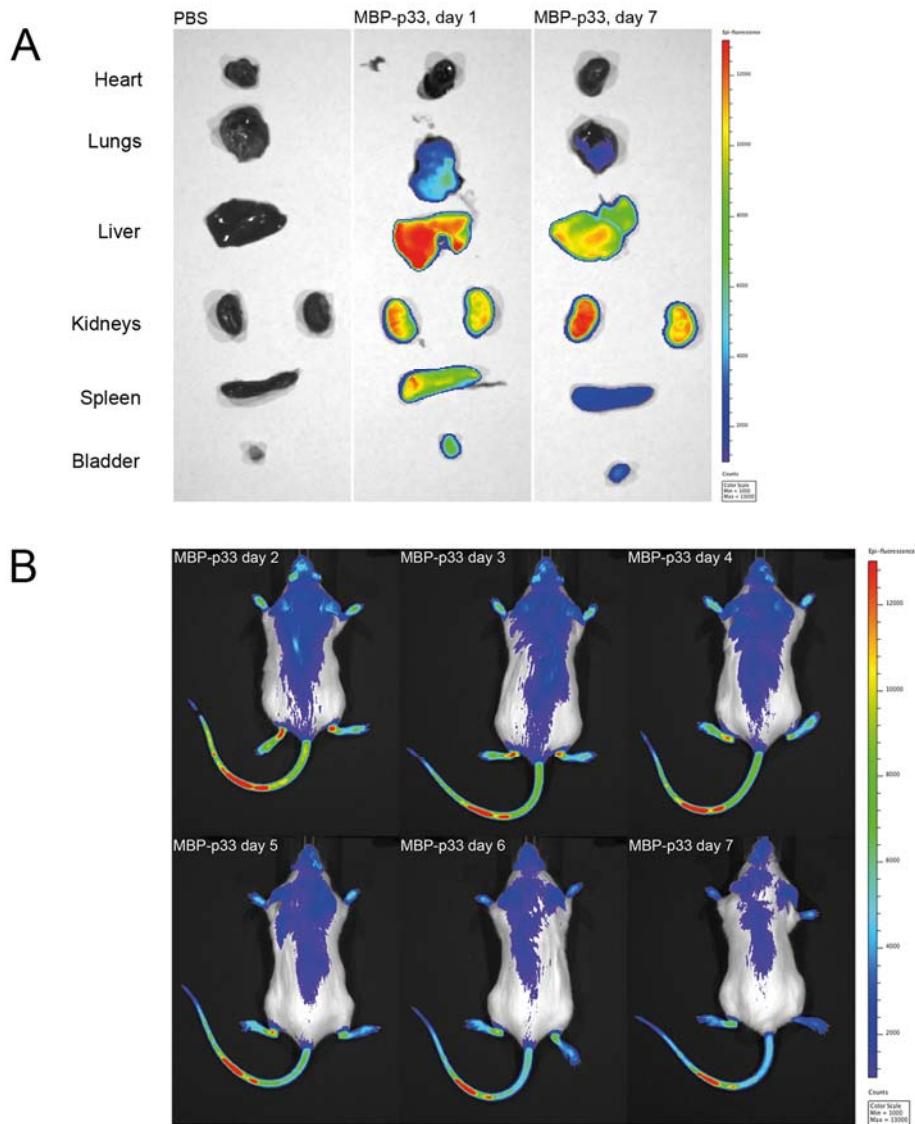

Supplemental Figure 3. **Deposition of injected MBP-p33 in mice.**

(A) Fluorescently labeled MBP-p33 was i.v. injected into a Balb/c mouse and its distribution and deposition in animals was followed for 7 days by an *IVIS* Spectrum station. PBS was used as a control.

(B) Organs from mice injected with fluorescently labeled MBP-p33 at time points day 1 and day 7. PBS was used as a control.
